1 **Current and future ocean chemistry negatively impacts calcification in**  
2 **predatory planktonic snails**

3

4

5 <sup>1</sup> \* Deborah Wall-Palmer

6 <sup>1,2</sup> Lisette Mekkes

7 <sup>1</sup> Paula Ramos-Silva

8 <sup>3,4</sup> Linda K. Dämmer

9 <sup>5</sup> Erica Goetze

10 <sup>3</sup> Karel Bakker

11 <sup>1</sup> Elza Duijm

12 <sup>1,2</sup> Katja T.C.A. Peijnenburg

13

14

15 <sup>1</sup> Marine Biodiversity Group, Naturalis Biodiversity Center, The Netherlands.

16

17 <sup>2</sup> Department of Freshwater and Marine Ecology, Institute for Biodiversity and  
18 Ecosystem Dynamics (IBED), University of Amsterdam, The Netherlands.

19

20 <sup>3</sup> Department of Ocean Systems, Royal Netherlands Institute for Sea Research  
21 (NIOZ), Texel, and Utrecht University, The Netherlands.

22

23 <sup>4</sup> *now at Environmental Geology, Department of Geology, Institute of Geosciences,*  
24 *University of Bonn, Bonn, Germany*

25

26 <sup>5</sup> Department of Oceanography, University of Hawai'i at Mānoa, Honolulu, USA.

27

28

29 \* Corresponding author

30

31 Email: [dmwallpalmer@gmail.com](mailto:dmwallpalmer@gmail.com)

32

33

34 Planktonic gastropods mediate an important flux of carbonate from the surface to the  
35 deep ocean. However, we know little about the response of atlantid heteropods, the  
36 only predatory, aragonite shelled zooplankton, to ocean acidification (OA), and they  
37 are not incorporated in any carbonate flux models. Here we quantify the effects of OA  
38 on calcification and gene expression in atlantids across three pH scenarios: mid-  
39 1960's, ambient, and future 2050 conditions. Atlantid calcification responses to  
40 decreasing pH were negative, but not uniform, across the three scenarios.  
41 Calcification was reduced from mid-1960s to ambient conditions, and longer shells  
42 were grown under 2050 conditions. Differential gene expression indicated a stress  
43 response at both ambient and future conditions, with down-regulation of growth and  
44 biomineralization genes with decreasing pH. Our results suggest that ocean  
45 chemistry in the South Atlantic is already limiting atlantid calcification, and that  
46 exposure to near-future OA triggers rapid shell growth under stress.

47

48

## 49 Introduction

50

51 Calcifying planktonic gastropods play an important role in ocean carbonate flux, by  
52 transporting inorganic carbon from the ocean surface into deep waters via the rapid  
53 sinking of their relatively heavy calcium carbonate shells <sup>1-3</sup>. Although small (up to  
54 ~2 cm), holoplanktonic gastropods are widespread and can be highly abundant in the  
55 upper ocean, exceeding densities of 10,000 individuals per m<sup>3</sup> of seawater <sup>4</sup>.  
56 Consequently, it is estimated that shelled pteropods, one holoplanktonic gastropod  
57 group, produce up to 89% of all pelagic calcium carbonate (CaCO<sub>3</sub>) <sup>3</sup>, generating at  
58 least 12% of the total carbonate flux worldwide <sup>5</sup>, and up to 33% of CaCO<sub>3</sub> exported  
59 into shallow (~100 m) waters <sup>3</sup>. The transport of carbon from the ocean surface into  
60 deep water by planktonic gastropods (and other calcifying plankton) in turn allows the  
61 ocean to absorb more carbon, in the form of carbon dioxide (CO<sub>2</sub>). The oceans are  
62 therefore an important sink for CO<sub>2</sub> and have taken up ~30% of all cumulative  
63 releases of anthropogenic CO<sub>2</sub>, slowing the accumulation of CO<sub>2</sub> in our atmosphere  
64 <sup>6</sup>. However, the current increased uptake of CO<sub>2</sub> by the oceans has led to a reduction  
65 in ocean pH at a rate unprecedented during the last 66 million years <sup>6-11</sup>. The  
66 adverse consequences of this anthropogenic ocean acidification (OA) are being felt  
67 by many marine organisms <sup>12,13</sup>. Recent research has confirmed negative effects of  
68 OA for shelled pteropods, including reduced calcification, increased shell dissolution  
69 and differential gene expression <sup>14-17</sup> and has highlighted them as useful OA-  
70 indicators, especially at higher latitudes <sup>15,18</sup>. However, another abundant and  
71 ecologically important holoplanktonic gastropod group <sup>19</sup>, the atlantid heteropods,  
72 have been largely overlooked in OA research. Apart from the physical structure of  
73 their shells <sup>20</sup>, the calcification mechanisms for atlantids are unknown <sup>20,21</sup> and  
74 atlantids have not been considered in any models of carbonate flux thus far <sup>3</sup>.

75

76 Pteropods and heteropods (holoplanktonic gastropods) are thought to be amongst  
77 the most susceptible groups to OA and likely the first to experience it, due to a  
78 combination of three factors that make these two groups similarly vulnerable. First, all  
79 holoplanktonic gastropods rely on an aragonitic shell; even species generally  
80 considered shell-less have a shell at the larval stage <sup>22</sup>. Aragonite, a metastable form  
81 of calcium carbonate that is especially soluble in seawater <sup>23</sup>, becomes difficult and  
82 energetically costly <sup>13,24</sup> to produce under OA conditions, and aragonitic shells can

83 dissolve if aragonite undersaturation occurs <sup>25</sup>. Second, holoplanktonic gastropods  
84 inhabit the upper ocean, where the greatest proportion of anthropogenic CO<sub>2</sub> is being  
85 absorbed <sup>26</sup>. Most holoplanktonic gastropods also undergo diel vertical migrations  
86 over hundreds of meters <sup>22,27</sup>. With shoaling of the aragonite saturation horizon, they  
87 are increasingly likely to encounter deep waters that are undersaturated with respect  
88 to aragonite <sup>28</sup>, thereby experiencing altered ocean chemistry across the vertical  
89 extent of their distributions. Third, holoplanktonic gastropods can have high  
90 abundances in cold, high latitude regions that have a higher capacity to absorb  
91 atmospheric CO<sub>2</sub>, thus more rapidly becoming acidic compared to warmer regions  
92 <sup>28,29</sup>.

93  
94 Although superficially similar, shelled pteropods (Thecosomata) and atlantid  
95 heteropods (Atlantidae, Pterotracheoidea) have evolutionarily independent origins  
96 and occupy different trophic levels. While shelled pteropods are particle-feeders via  
97 mucous webs, juvenile atlantids feed on algae using a ciliated velum and adult  
98 atlantids are selective, visual predators. As such, atlantids are the only aragonite  
99 shelled predatory plankton, and are uniquely positioned to indicate the effects of  
100 changing ocean chemistry on higher trophic levels. Adult atlantids rely on shelled  
101 pteropods as a primary food source <sup>22</sup>, which could make them even more vulnerable  
102 to the effects of OA. Atlantids are found in the epipelagic zone of open waters mainly  
103 from tropical to temperate latitudes, although there are two cold water species <sup>30</sup>.  
104 *Atlanta ariejansseni* is the most southerly distributed atlantid species, being restricted  
105 to the Southern Subtropical Convergence Zone between 35–48°S, where it can  
106 reach abundances of up to ~200 individuals per 1000 m<sup>3</sup> and likely represents an  
107 important predator within the plankton <sup>31</sup>. The cold water distribution and relatively  
108 high abundance of *A. ariejansseni* make it an excellent candidate as an OA sentinel  
109 species. In addition, juvenile atlantids are relatively easily maintained under  
110 laboratory conditions because they feed on algae using their ciliated velum. This  
111 makes them ideal organisms with which to study the effects of changing ocean  
112 carbonate chemistry on planktonic gastropod calcification.

113  
114 Here we present results of the first growth and OA experiments focussed on  
115 heteropods, and the first transcriptome of a heteropod. We address the following  
116 questions: (1) What is the rate of atlantid shell growth under current ambient

117 conditions in the South Atlantic Ocean? (2) Has atlantid calcification already altered  
118 in response to recent changes in high latitude ocean carbonate chemistry? (3) Will  
119 future ocean conditions lead to a decline in atlantid calcification, similar to the  
120 response found for shelled pteropods? Experiments were carried out in the South  
121 Atlantic Ocean on board the *RRS Discovery*. The calcification response of juvenile *A.*  
122 *ariejansseni* to variations in ocean carbonate chemistry was investigated under  
123 ambient conditions for up to 11 days (ambient shell growth), and under realistic past,  
124 ambient and future ocean carbonate chemistry scenarios for three days. We use a  
125 thorough multi-disciplinary approach, combining fluorescence microscopy (n=184)  
126 and micro-CT scanning (n=43) of the same individuals to quantify shell growth, as  
127 well as RNA sequencing of pooled individuals from the same experiments to detect  
128 differential gene expression as an OA response. Shell growth parameters show for  
129 the first time that ambient seawater conditions in the South Atlantic already limit  
130 atlantid calcification, and that predicted future ocean carbonate chemistry causes  
131 atlantids to grow faster, which may be a stress response. Shell growth  
132 measurements are supported by differentially expressed genes that indicate the  
133 down-regulation of growth and biomineralisation genes with increasing pH. This  
134 study demonstrates the suitability of atlantids as an OA sentinel, and highlights that  
135 changes in calcification and consequently a likely reduction in the transport of  
136 carbonate from the surface to the deep ocean, are already occurring in the South  
137 Atlantic Ocean.

138

## 139 **Results and Discussion**

140

### 141 **Shell growth under ambient conditions**

142

143 To measure shell calcification rate under current ocean conditions, juvenile *A.*  
144 *ariejansseni* collected from the Southern Subtropical Convergence Zone in the South  
145 Atlantic were stained with calcein indicator (Fig. 1a, 1e), incubated in ambient waters  
146 with high food availability and a subsample of specimens was collected every 2–3  
147 days for up to 11 days. Here we show that the calcein indicator, which is incorporated  
148 into the shells during growth and can be detected using fluorescence microscopy,  
149 was only integrated into the apertural/growing edge of the shell, suggesting that the  
150 shell is not thickened from inside as is observed in some pteropods<sup>32</sup>. Shell

151 extension is therefore an informative measure of shell growth. Some small repairs  
152 from the inside surface of the shell, similar to those found in pteropods<sup>33</sup> were also  
153 observed (Supplementary Figure S1).

154

155 Over three to eleven days, specimens grew up to 99  $\mu\text{m}$  (shell extension) per day  
156 ( $n=44$ , Table 1). Individuals grew significantly between sampling days (Kruskal-Wallis  
157  $H(2)=12.08$ ,  $p=0.017$ ). However, there is a drop in mean shell extension at day nine,  
158 which may be due to a pause in shell growth to undergo metamorphosis (Table 1,  
159 Fig. 2a). Towards the end of the experiment, several individuals were observed to  
160 have undergone metamorphosis, having lost their velum and developed their  
161 swimming fin. Mean shell extension (all specimens) and maximum shell extension  
162 (largest specimen for each collection day) varied from 30–69  $\mu\text{m}$  and 54–99  $\mu\text{m}$  per  
163 day respectively, and both were found to decrease exponentially with age (Fig. 2b).  
164 This pattern may be due to the relatively broader surface of the shell as the atlantid  
165 increases with age, such that the amount of shell produced may be approximately  
166 the same. Adult specimens of *A. ariejansseni* exhibit the lowest growth rate of  $\sim 25$   
167  $\mu\text{m}$  per day (mean of 5 adult specimens). Assuming that the shell of *A. ariejansseni*  
168 follows the exponential decrease in shell extension identified by the mean shell  
169 extension per day ( $-26.89\ln[\text{days}]+95.076$ ), and assuming that the rate never falls  
170 below 25  $\mu\text{m}$  per day, it would take around 116 days for an *A. ariejansseni* specimen  
171 to grow to full adult size ( $\sim 3200$   $\mu\text{m}$  of shell extension measured along whorl suture).

172

173 The tempo of the atlantid life cycle is, until now, completely unknown and our results  
174 give a first estimate of their minimum longevity. If atlantids reach reproductive  
175 maturity in  $\sim 116$  days, this could allow for more than one generation per year. This is  
176 comparable to the shelled pteropods, which are thought to live for  $\sim 1$ –2 years and  
177 may produce two generations of offspring per year in the Southern Ocean<sup>34,35</sup>.  
178 During specimen collection in the South Atlantic Ocean for the present study, small  
179 juvenile and large adult specimens were present in the same location at the same  
180 time, supporting this inference. Juvenile specimens of *A. ariejansseni* have been  
181 caught at the beginning (September) and end (February) of the summer growing  
182 season in sediment traps moored in the Southern Ocean offshore of Tasmania  
183 ( $47^\circ\text{S}$ ,  $142^\circ\text{E}$ )<sup>36</sup>. This suggests that, similar to the pteropod *Limacina helicina*  
184 *antarctica*, *A. ariejansseni* could have an overwintering juvenile population.

185

## 186 **The effects of OA on calcification**

187

188 To evaluate the effects of future and past ocean carbonate chemistry on atlantid  
189 calcification, specimens of *A. ariejansseni* were incubated for three days across three  
190 pH scenarios (n=184). We applied a past scenario of 0.05 pH units higher than  
191 ambient (ambient pH  $8.14 \pm 0.02$ , past pH  $8.19 \pm 0.02$ ) that is approximately  
192 equivalent to the mid-1960s (assuming a decrease in pH of 0.001 units per year in  
193 this region)<sup>11</sup>, and a future OA scenario of 0.11 pH units lower than ambient (pH  $8.03$   
194  $\pm 0.00$ ), which is approximately equivalent to expectations for the year 2050 in the  
195 South Atlantic Ocean (under IPCC Representative Concentration Pathway RCP8.5)  
196<sup>7,37</sup>. Aragonite saturation was maintained in all scenarios ( $\Omega > 1.82$ ). Calcification was  
197 measured in three ways: mean shell extension was measured from fluorescence  
198 images, while the volume of shell grown during the experiment (referred to as shell  
199 volume) and the mean thickness of the shell grown during the experiment (referred to  
200 as shell thickness) were quantified using micro-CT scanning (Figs 1, 3). The effects  
201 of OA on calcification differed across treatments, which was also observed in the  
202 transcriptomic response.

203

204 Individuals grew less shell (shorter shell extension and lower volume) under the  
205 ambient pH compared to the pH of the mid-1960s, suggesting that ambient  
206 conditions in the South Atlantic Ocean already limit calcification of atlantid  
207 heteropods. Shell extension and shell volume grown under ambient conditions were  
208 found to be significantly lower than shell extension and shell volume grown under the  
209 mid-1960s treatment (Fig. 3a, extension Tukey's HSD  $p=0.005$ ; volume Mann-  
210 Whitney  $p=0.015$ ). However, shell thickness remained similar between the mid-1960s  
211 and ambient treatments (Fig. 3c, Kruskal-Wallis  $H(2)=2.606$ ,  $p=0.272$ ). A reduction in  
212 calcification from the past to the present has also been found in shelled pteropods  
213 from time series data<sup>38,39</sup>. In the Mediterranean Sea, *Styliola subula* specimens  
214 collected in 1921 had thicker shells when compared to specimens collected in 2012,  
215 and *Cavolinia inflexa* shells collected in 1910 were denser than those collected in  
216 2012<sup>38</sup>. Corresponding reduction in seawater pH in these areas varied by 0.09-0.10  
217 units<sup>38</sup>. Offshore of northern Australia, a decline in the aragonite saturation state was  
218 also found to be accompanied by decreasing shell thickness and increasing shell

219 porosity of two pteropod species from the 1980s to 2009<sup>39</sup>. The only perturbation  
220 experiment to consider past (higher than ambient) pH on shelled pteropods found no  
221 significant differences between shell mass of *Limacina retroversa* grown under pre-  
222 industrial (pH 8.2 in that region) and ambient (pH 8.0) conditions<sup>40</sup>.

223

224 A further reduction in calcification with decreasing pH was not observed in *A.*  
225 *ariejansseni* for the 2050 treatment. Instead, a different type of response was found.  
226 Individuals grown under future 2050 conditions produced the same volume of shell  
227 as individuals grown under ambient conditions (Fig. 3b, volume Mann-Whitney  
228  $p=0.156$ ), however, shell extension was significantly greater under the future 2050  
229 treatment than under ambient conditions (Fig. 3a, extension Tukey's HSD  $p<0.001$ ).  
230 The shells grown under the 2050 treatment were generally thinner ( $10.6 \mu\text{m} \pm 1.3$   
231  $\text{mean} \pm \text{s.d.}$ ) than those grown under both ambient ( $11.6 \mu\text{m} \pm 1.8$ ) and mid-1960s  
232 ( $11.5 \mu\text{m} \pm 1.3$ ) conditions, although this relationship was not significant (Fig. 3c,  
233 Mann-Whitney  $p=0.102$ ). The increased shell extension observed under 2050  
234 conditions in the present study may indicate a stress response to the lowered pH,  
235 which is supported by our gene expression results (see below). It has been shown  
236 that some calcifying organisms are able to increase the rates of biological processes,  
237 such as metabolism and calcification, in response to low pH in order to compensate  
238 for the increased acidity<sup>41</sup>. However, this often comes at a cost to overall fitness<sup>41</sup>  
239 and such increased rates cannot be sustained in the long term. In pteropods, OA is  
240 known to negatively impact metabolic processes<sup>16,17</sup>.

241

242 At the gene expression level, we also found a different response between treatments.  
243 From the mid-1960s to the ambient conditions 110 genes were differentially  
244 expressed (DE) (66 down- and 44 up-regulated), while from the ambient to the 2050  
245 conditions there were 49 DE genes (12 down and 37 up-regulated), with only 9 of  
246 them shared between treatments (Fig. S4, adjusted  $P < 0.05$ ). In total the DE genes  
247 account for approximately 0.5% of the *A. ariejansseni de novo* transcriptome (Table  
248 S1), which is in the range of previous transcriptomic responses to high  $\text{CO}_2$  in  
249 pteropods (0.001% to 2.6%)<sup>14,15,49,50</sup> and copepods (0.25%)<sup>51</sup>. Based on the  
250 transcriptome annotation (Table S2) most genes that were responsive to changes in  
251 the carbonate chemistry are potentially involved in the immune response, protein  
252 synthesis and degradation, biomineralization, carbohydrate metabolism,



253 morphogenesis and development, ion transport, oxidation-reduction and lipid  
254 metabolism (Tables S3-S4).

255

256 Most differentially expressed genes identified as potentially involved in  
257 biomineralization (Fig. 4) were down-regulated with decreasing pH, along with the  
258 observed reduction in overall shell calcification (Fig. 4). Candidate biomineralization  
259 genes included those coding for extracellular shell matrix proteins<sup>52,53</sup> such as  
260 mucins and two chitin binding proteins, but also genes potentially involved in the  
261 transport of both proteins and ions to the biomineralization site<sup>54</sup>, including a sodium  
262 dependent transporter and a calcium activated-channel regulator. A smaller fraction  
263 of DE biomineralization genes were up-regulated from the mid-1960s to the ambient  
264 conditions and/or from the ambient to the future 2050 ocean pH, including members  
265 of the mucin, perlucin-like and MAM and LDL-receptor families. These transcriptional  
266 changes together with the different calcification responses over changing ocean  
267 carbonate chemistry also suggest that distinct genes underlie the control of shell  
268 extension and thickness.

269

270 Differential gene expression analyses indicated a moderate stress response at both  
271 ambient and 2050 future system states<sup>55</sup> (and references therein), with up-regulation  
272 of protein synthesis with decreasing pH (Fig S5a-b in red and Fig. S5d). Such  
273 metabolic increase was at the cost of other organism processes with the overall  
274 down-regulation of genes involved in development, growth and biomineralization (Fig  
275 4b, Fig. S5a-b in blue and Fig S5c). This response contrasts with the *extreme stress*  
276 *response*<sup>51,55,56</sup> observed for the pteropod *Heliconoides inflatus* in a similar 3-day  
277 calcification experiment where OA was shown to negatively impact metabolic  
278 processes and up-regulate biomineralization<sup>17</sup>. These differences are likely to be  
279 due to taxon-specific responses, although an *extreme stress response*<sup>55,56</sup> could  
280 have been mitigated by the replete food conditions in our experiment.

281

### 282 **The effects of plentiful food**

283

284 Plentiful food provided during the incubations may have allowed atlantids to grow  
285 thicker shells under experimental conditions in comparison to shell grown *it situ*. OA  
286 experiments on shelled pteropods indicate that a lack of food has negative effects on

287 specimen condition <sup>42</sup>. Nutrition is also likely important for atlantid shell production  
288 because they are thought to calcify close to the deep chlorophyll maximum <sup>27</sup>, a  
289 region of higher food availability. Therefore, the juvenile atlantids in OA incubations  
290 were all kept under replete food conditions. Specimens were observed to feed well  
291 during the experiments, with the chlorophyll-rich algae in their stomachs clearly  
292 visible through their transparent shells (Supplementary Figure S1).

293

294 Aside from the differences between treatments detailed above, the mean thickness of  
295 the shell grown during the OA experiments was significantly higher (1.6 to 2.6 times  
296 higher) than the shell grown prior to the experiment for all shells measured in all  
297 treatments (t-test,  $t=-20.720$ ,  $p<0.001$ ,  $n=41$ ). All micro-CT scanned individuals  
298 show an initial thickening of the shell ( $n=43$ , Fig. 1c,g,i-k) that coincides with the  
299 onset of the experiment (apart from two specimens in which the thickening occurred  
300 after the onset). It is likely that enhanced calcification from the start of the  
301 experiments is related to the availability of plentiful food in all treatments. All of the 3  
302 day OA experimental treatments received the same amount of food, so the effects of  
303 food are independent from the effects of the three different treatments in our  
304 experiment.

305

306 Individuals in the 11 day ambient growth experiments were fed a much higher  
307 concentration of food because it was anticipated that they would remain in the  
308 experiment for up to 24 days (the experiment was terminated at 11 days due to  
309 cannibalism caused by metamorphosis). When comparing these specimens at day  
310 three ( $n=8$ , pH 8.15) to specimens incubated for three days under the same ambient  
311 conditions for the OA experiment ( $n=63$ , pH  $8.14 \pm 0.02$ ), but with eight times less  
312 food, a significant difference in the shell extension was found (t-test,  $t=8.714$ ,  
313  $p<0.001$ ). Specimens given a higher concentration of food grew on average 1.62  
314 times longer shell than those with the lower food concentration (mean 208  $\mu\text{m}$  and  
315 129  $\mu\text{m}$  respectively).

316

317 These results suggest that increased food availability leads to increased calcification,  
318 and that a plentiful food supply could offset OA induced reduction in calcification.  
319 Similar trends have been found in other calcifying organisms, including pteropods <sup>43</sup>,  
320 corals <sup>44,45</sup> and the early benthic stages of the bivalve mollusc *Mytilus edulis* <sup>46</sup>. The

321 pteropod *Heliconoides inflatus* was found to produce shells that were 40% thicker  
322 and 20% larger in diameter during periods of naturally high nutrient concentrations in  
323 the Cariaco basin (compared to specimens sampled during oligotrophic conditions)  
324 <sup>43</sup>. A review of OA studies on calcifying marine organisms found that an intermediate  
325 or high food supply increased the resistance to low pH for growth and calcification <sup>47</sup>.

326

### 327 **A complex response to OA**

328

329 The results of this first study on the effects of OA upon atlantid heteropods have  
330 revealed a complex organismal response. Ocean carbonate chemistry with  
331 decreasing pH had a negative, but varied effect on calcification, both from the higher  
332 pH of the mid-1960s to the ambient conditions, and from the ambient conditions to  
333 lower ocean pH predicted for 2050. A reduction in shell extension and shell volume  
334 from the mid-1960s to the present conditions suggests that ambient water chemistry  
335 is already limiting atlantid calcification. An increase in shell extension from ambient to  
336 2050 conditions may indicate a stress response to grow to a larger size as quickly as  
337 possible with rapidly decreasing pH. Gene expression analyses indicated a moderate  
338 stress response at both ambient and 2050 future conditions <sup>48</sup>, with down-regulation  
339 of growth and calcification, and up-regulation of protein synthesis with decreasing  
340 pH. However, the high availability of food may have increased calcification across all  
341 treatments, and it may be that increased food supply can mitigate some of the  
342 negative effects of OA on juvenile atlantids. At the adult stage, however, atlantids  
343 feed primarily on shelled pteropods <sup>22</sup>, and the assumed decline in the abundance of  
344 OA sensitive pteropods will have a negative effect on food availability for adult  
345 atlantids. The fairly short time that it takes an atlantid to reach maturity may mean  
346 that multiple generations are produced each year, and this could help atlantids adapt  
347 more quickly to a rapidly changing ocean <sup>49</sup>.

348

349 In summary, the findings of this study indicate that calcification in atlantids is already  
350 impacted by OA in the South Atlantic Ocean, however, some of the effects of OA on  
351 atlantid calcification could be mitigated by replete food. Our results demonstrate that  
352 the effects of OA on atlantid calcification and their subsequent export of carbonate to  
353 deep waters is not straight forward, and likely depends on whether these organisms  
354 are able to survive and maintain calcification under stressful conditions in the long

355 term. Evidence suggests that both shelled pteropods and atlantids survived the  
356 Cretaceous-Paleogene extinction event (KPg or KT) and Paleocene-Eocene Thermal  
357 Maximum (PETM), both periods of extreme perturbation in the ocean's carbon cycle  
358 <sup>50,51</sup>. This observation gives some hope that aragonite shelled holoplanktonic  
359 gastropods will be able to adapt to our changing oceans, even though the rate of  
360 change is unprecedented relative to the geological record. *Atlanta ariejansseni*  
361 resides in cool convergence waters where rapid changes in water temperature and  
362 water stratification are expected to be additional stressors <sup>52</sup>. Future studies should  
363 seek to understand the synergistic effects of ocean acidification and warming, to  
364 understand variability in the environment in which atlantids live (and environmental  
365 tolerances that they may already have), and to thoroughly investigate how nutrition  
366 affects calcification and growth.

367

368

369 **Methods**

370

371 **Specimen collection and staining.** Specimens of *Atlanta ariejansseni* were  
372 collected in the Southern Subtropical Convergence Zone during the Atlantic  
373 Meridional Transect (AMT) 27 (DY084/085) cruise of the *RRS Discovery*. Animals for  
374 growth experiments were collected on the 24<sup>th</sup> October 2017 at 35°58 S, 27°57 W  
375 and for OA experiments on the 26<sup>th</sup> October 2017 at 41°09 S, 30°00 W. For both  
376 experiments, samples were collected using a 1 m diameter ring net with 200 µm  
377 mesh and a closed cod-end for three slow, short (20 minute) oblique tows to a  
378 maximum depth of 100 m. Samples were collected during hours of darkness between  
379 00:38 and 01:57. Specimens of *A. ariejansseni* were immediately sorted from the net  
380 samples using a light microscope and placed in calcein indicator for two hours in the  
381 dark (MERCK Calcein indicator for metal determination, CAS 1461-15-0,  
382 concentration 50 mg/l in seawater filtered through a 0.2 µm filter). Specimens were  
383 then gently rinsed with 0.2 µm filtered seawater and introduced into the experimental  
384 carboys.

385

386 **OA experiment.** Surface seawater was filtered at 0.2 µm into four 60 litre barrels,  
387 which underwent the following treatments. In one barrel, lowered pH was achieved  
388 by bubbling 795 ppm CO<sub>2</sub> in air through the water for 12 hours, attaining 0.11 pH  
389 units below ambient (pH 8.05). In a second barrel, higher pH was achieved by  
390 bubbling 180 ppm CO<sub>2</sub> in air through the water for 12 hours, attaining 0.02 pH units  
391 above ambient (pH 8.18). The final two barrels of ambient and control (ambient)  
392 water at pH 8.16 ± 0.00 were not subjected to any gas bubbling. During gas bubbling,  
393 all water was maintained at ambient ocean temperatures (at the depth of collection),  
394 between 14-16 °C within a temperature controlled room on board the *RRS Discovery*.  
395 Temperature, salinity and pH (resolution of pH 0.001, precision of pH ± 0.002,  
396 HANNA HI5522-02) were measured from the four barrels after 12 hours, and  
397 samples to measure Dissolved Inorganic Carbon (DIC) concentration were collected.  
398 Immediately prior to specimen collection, three carboys of six litres were filled for  
399 each of the treated and ambient seawaters. A further two carboys were filled with  
400 ambient seawater to act as controls (no specimens added). Natural algal  
401 concentrations at the deep chlorophyll maximum in the study region are ~0.2 µg/l  
402 (AMT data extracted from British Oceanographic Data Centre). To ensure that food

403 was not limiting calcification rates, dried algae (a mixture of 33.3% *Phaeodactylum*,  
404 33.3% *Nannochloropsis*, 33.3% *Tetraselmis*) was added to each of the carboys  
405 (including the controls) at a concentration of 0.6 mg/l (0.2 mg/l/day; 3.6 mg per  
406 carboy).

407

408 Calcein-stained specimens (n=274, 217 for physical measurements, 57 for gene  
409 expression analysis) were introduced into the carboys in a random order. Between  
410 90 and 92 juveniles were exposed to each treatment. Specimens of *A. ariejansseni*  
411 were identified by their shell morphology<sup>31</sup>, and juveniles were recognised based on  
412 size, presence of the velum and absence of black eye pigmentation. Carboys were  
413 sealed and immediately incubated at ambient temperature within a temperature  
414 controlled room (14-16 °C). Blackout fabric was draped over the carboys to maintain  
415 low light levels. The carboys were incubated for three days. At the end of the third  
416 day, temperature, salinity and pH were measured, and DIC concentration samples  
417 were collected from all carboys. Specimens were removed from the carboys, and  
418 examined under a light microscope to verify that they were still alive (movement). 20  
419 live juveniles were pooled for each treatment (from one replicate), preserved in  
420 RNAlater (Invitrogen) and frozen for RNAseq analyses. The remaining specimens  
421 were flash frozen in liquid nitrogen and stored at -20 °C until analysis.

422

423 Across all treatments, the pH of the experimental carboys was stable from the start to  
424 the end of the experiment and remained fairly consistent between replicates (Table  
425 2). The pH of two control carboys containing ambient water and no specimens also  
426 remained stable over the three days and did not differ from the ambient experiment.  
427 The water remained supersaturated with regards to aragonite throughout all  
428 treatments (Table 2) and no signs of shell dissolution were observed (surface etching  
429 or clouding of the shells). Mortality was extremely low across all treatments, with only  
430 a single specimen (ambient treatment) having died during the experiment.

431

432 **Growth rate experiment.** Surface seawater was filtered at 0.2 µm and maintained at  
433 ambient temperature in a 6 l carboy. Temperature, salinity and pH were measured  
434 and samples for DIC concentration were collected prior to adding specimens. Dried  
435 algae were added to the carboy at a concentration of 4.8 mg/l, to allow for  
436 approximately 24 days of feeding (0.2 mg/l/day. 28.8 mg per carboy). Calcein-stained

437 specimens (n=57) were introduced into the carboy, which was immediately sealed  
438 and incubated at ambient temperature, covered with blackout fabric. After three days,  
439 temperature, salinity and pH measurements were made, and a sample for DIC  
440 concentration was collected. Up to ten live individuals were removed and flash frozen  
441 in liquid nitrogen and stored at -20 °C until analysis. Any dead specimens retrieved at  
442 this stage were removed from the experiment and discarded (total for the whole  
443 experiment n=13). Subsequent to sampling, the carboy was sealed and returned to  
444 ambient, dark conditions. Sampling was carried out in the same way for water  
445 parameters and specimens approximately every two days. The experiment was  
446 terminated at 11 days because some specimens metamorphosed and began to  
447 cannibalise other animals in the experiment.

448

449 **Water chemistry.** Dissolved Inorganic Carbon (DIC) samples were filtered into 5 ml  
450 glass vials. The water samples contained no head space and were poisoned with 15  
451 µl of saturated mercury (II) chloride (HgCl<sub>2</sub>). Analysis of DIC was carried out at the  
452 Royal Netherlands Institute for Sea Research (NIOZ), Texel, The Netherlands, using  
453 a Technicon Traacs 800 autoanalyzer spectrophotometric system following the  
454 methodology of Stoll et al.<sup>53</sup>. pH was measured on the NBS scale using a research  
455 grade benchtop pH meter (HANNA HI5522-02) and a glass electrode with a  
456 resolution of 0.001 units, and a precision of ± 0.002 units. The pH meter was  
457 regularly calibrated using NBS standards. Other carbonate system parameters were  
458 calculated from the measured DIC and measured pH<sup>54</sup> using CO2SYS (Excel V2.3)  
459<sup>55</sup>. The calculation used the constants K1 and K2 from Mehrbach et al.<sup>56</sup> refitted by  
460 Dickson and Millero<sup>57</sup> and the KHSO<sub>4</sub> dissociation constant of Dickson<sup>58</sup>. Nutrient  
461 concentrations (P and Si) were measured from surface CTD samples in the regions  
462 where water was collected for the experiments<sup>59</sup>. All carbonate system parameters  
463 are correlated (Pearson r= -0.996–0.977, p=<0.002), except DIC and total alkalinity  
464 (Pearson r= -0.114, p=0.687).

465

466 **Shell extension.** Shell cleaning and fluorescent imaging was carried out at the Royal  
467 Netherlands Institute for Sea Research (NIOZ), Texel, The Netherlands. Organic  
468 material was removed from the shells by oxidising the specimens in a Tracerlab low  
469 temperature (~100 °C) asher. This ensured minimal damage compared to chemical  
470 and physical washing techniques. Specimens were air dried for 24 hours and then

471 oxidised in the low temperature asher for five hours. Specimens were then gently  
472 rinsed with ethanol and ultra-high purity water (MilliQ) to remove any ash residue,  
473 and dried in a cool oven (40 °C) for 15 minutes. Specimens were imaged using a  
474 Zeiss Axioplan 2 microscope with a Colibri light source and filter (excitation 485/20,  
475 FT 510, emission 515-565) producing a final wavelength of 515-565 nm. The extent  
476 of fluorescent shell was measured along the suture between the last whorl and the  
477 preceding whorl using the software FIJI (ImageJ) <sup>60</sup>. Despite extreme care being  
478 taken during shell handling, the growing edge of some shells was damaged,  
479 providing only a minimum measure of shell extension. Therefore, for the OA  
480 experiments, severely damaged specimens (n=31), where the shell edge was broken  
481 back to the calcein stained region (start of the experiment), were not included in  
482 subsequent analyses.

483

484 **Shell thickness and volume.** Specimens were visually inspected using light  
485 microscopy to determine whether there was any damage at the growing edge of the  
486 shell. Between 14 and 15 undamaged specimens were randomly selected from each  
487 treatment (total n=43 specimens) and scanned using a Zeiss Xradia 520 Versa  
488 microCT at Naturalis Biodiversity Center, Leiden, The Netherlands. Scans were  
489 carried out using between 140/10 and 150/10 kV/W for between 2 and 3 hours per  
490 specimen. The scan resolution was 0.54–0.68 µm with an exposure time of 5–10  
491 seconds. Data were processed using the software Avizo 2019.1 (Thermo Fisher).  
492 Shells were segmented to separate the part of the shell that had grown during the  
493 experiment. This was achieved by manually matching the fluorescent images to the  
494 microCT thickness map using whorl counting and other landmarks such as growth  
495 lines and repair marks on the shells (Fig. 1a-h). The segmented shells were then  
496 analysed for the volume and mean thickness of the shell grown during the  
497 experiment. MicroCT images were also measured to determine maximum shell  
498 diameter. Mean shell thickness was found to negatively correlate to shell diameter  
499 (Pearson  $r=-0.669$ ,  $p<0.001$ ,  $n=39$ ), but only for shell grown prior to the experiments  
500 (Fig. S2). The mean thickness of shell grown during the experiments was not  
501 correlated to shell diameter for any of the treatments.

502

503 **Statistical analyses.** To determine correlations between variables, for example  
504 between shell thickness and shell diameter, Pearson's Chi-squared was used, and to



505 confirm correlations between the carbonate system parameters, a full pairwise matrix  
506 of Pearson's correlation coefficients was made. Growth measurement data for the  
507 OA experiments (shell extension, shell thickness and shell volume), and shell  
508 extension per day for the ambient growth experiment were checked for a normal  
509 distribution using a Levene's test. Shell extension data were normally distributed  
510 (Levene's  $p < 0.001$ ). The shell thickness and shell volume were not normally  
511 distributed (Levene's  $p = 0.253$  and  $p = 0.663$ , respectively). To identify whether shell  
512 extension from the OA experiment varied between treatments, a one-way ANOVA  
513 was performed, followed by a Tukey's HSD posthoc test to indicate more detailed  
514 differences between treatments. A Kruskal-Wallis test for equal medians was  
515 carried out on the shell thickness and shell volume from the OA experiments, and on  
516 the shell extension from the ambient growth experiment. Where a significant  
517 difference between sample medians was identified, a Mann-Whitney posthoc test  
518 was performed to indicate more detailed differences between treatments. Statistical  
519 analyses were carried out using PAST v3.12<sup>61</sup>.

520

521 **RNA extraction and sequencing.** Due to the small size of *Atlanta ariejansseni*  
522 juveniles (mean diameter of a subset  $381 \pm 73 \mu\text{m}$ ,  $n=39$ ), total RNA was extracted  
523 from samples of 8–10 individuals randomly pooled from each treatment using the  
524 RNeasy Plus Micro Kit (QIAGEN). This sampling provided 2 replicates per treatment  
525 (6 samples in total). Each sample of total RNA was analyzed for quantity and quality  
526 using the Bioanalyzer 2100 (Agilent Technologies) with a RNA 6000 Nano Chip. All  
527 samples had RIN scores ranging from 7.0 to 9.4 and were used for library  
528 preparation and sequencing. Libraries ( $n=6$ ) were generated with the NEBNext®  
529 Ultra II Directional Library Prep Kit for Illumina (New England BioLabs) using the  
530 manufacturer's protocol for Poly(A) mRNA magnetic isolation from 1  $\mu\text{g}$  total RNA per  
531 sample. Total RNA was added to NEBNext Sample Purification beads to isolate the  
532 mRNA. Purified mRNA was then fragmented into approx. 300 base-pair (bp)  
533 fragments and reverse transcribed into cDNA using dUTPs in the synthesis of the  
534 second strand. cDNA fragments were size selected and amplified with 8-9 PCR  
535 cycles using NEBNext Multiplex Dual Index kit (New England BioLabs) according to  
536 the manufacturer's instructions. Libraries were checked for quantity and quality on  
537 Bioanalyzer 2100 using an Agilent DNA High Sensitivity Chip. Average library sizes  
538 of 420 up to 450 bps (~300 bp insert +128 bp sequencing adapters) were accessed

539 using the Agilent Bioanalyzer 2100. Sequencing was performed at the BaseClear BV  
540 Leiden on an Illumina NovaSeq 6000 platform using paired-end 150 base-pair  
541 sequences. All six libraries were sequenced producing a minimum of 6 giga base  
542 pairs (Gb) per library.

543

544 **De novo assembly and data analysis.** Raw reads were processed using  
545 trimmomatic (version 0.38<sup>62</sup>) to remove adapter sequences and reads lower than 36  
546 bps, and checked for quality using FastQC (version 0.11.8). Trimmed reads were  
547 pooled and assembled with Trinity v2.8.4<sup>63</sup> using default parameters. Open reading  
548 frames (ORFs) of the *de novo* transcriptome assembly were predicted using  
549 Transdecoder v5.5.0<sup>63</sup>. The ORFs of the longest isoforms from each trinity locus  
550 were blasted against a subset of the NCBI nr database (release from 9/20/19)  
551 including all Mollusca (txid6447), Stramenophiles (txid33634) and Viridiplantae  
552 (txid33090). Contigs having a best hit with molluscan sequences (e-value <10e<sup>-5</sup>)  
553 were considered *bona fide Atlanta ariejansseni* transcripts; all the other contigs (for  
554 example derived from the mixture of algae fed to the animals or other potential  
555 contaminants) were removed from the assembly. After this filtering, the distribution of  
556 GC content in the assembly appeared unimodal (Fig. S3) suggesting the major  
557 sources of contamination were removed without compromising the transcriptome  
558 completeness as determined with BUSCO<sup>64</sup> (Table S1). Next, transcript  
559 quantifications were estimated based on the raw reads and the raw transcriptome  
560 assembly as reference, using Salmon<sup>65</sup>. Only quantifications of transcripts present in  
561 the clean transcriptome assembly were used in differential gene expression  
562 estimation using the DESeq2 package<sup>66</sup> in pairwise comparisons between the  
563 ambient vs. higher mid-1960s pH and lower 2050 vs. ambient pH. Significant  
564 differentially expressed genes were selected based on P-adj values < 0.05 corrected  
565 for multiple testing with the Benjamini-Hochberg procedure, which controls false  
566 discovery rate (FDR) (Tables S3 and S4). Annotation of the clean transcriptome  
567 assembly was performed using the Trinotate v3.2.0 pipeline, which levered the  
568 results from different functional annotation strategies including homology searches  
569 using BLAST+ against Swissprot (release October 2019) and protein domain  
570 detection using HMMER<sup>67</sup> against PFAM<sup>68</sup> (release September 2018). Gene  
571 ontology (GO) terms obtained from this annotation strategy (Table S2) were trimmed  
572 using the GOSlimmer tool<sup>69</sup> followed by enrichment analyses using the GO-MWU

573 method described in <sup>70</sup>. This method used adaptive clustering of GO categories and  
574 Mann–Whitney U tests <sup>71</sup> based on ranking of signed log p-values to identify over-  
575 represented GO terms in the categories “Biological Process” and “Molecular  
576 Function”. In addition, genes were grouped in 10 main categories (*i.e.* putative  
577 processes or other) according to their BLAST+ best hits in RefSeq or Swissprot  
578 (releases October 2019) and associated GO terms (Table S3, Table S4): ‘immune  
579 response’, ‘protein synthesis’, ‘protein degradation’, ‘biomineralization’, ‘carbohydrate  
580 metabolism’, ‘development/morphogenesis’, ‘ion transport’, ‘oxidation-reduction’, ‘lipid  
581 metabolism’ and ‘other’. Gene expression heatmaps with hierarchical clustering of  
582 expression profiles were created with ClustVis <sup>72</sup>.

583

#### 584 **Data availability**

585 All data supporting the findings of this study is provided in the online supplementary  
586 information. Raw reads used in this study were deposited at NCBI BioProject  
587 PRJNA17165. The Transcriptome Shotgun Assembly has been deposited at  
588 DDBJ/EMBL/GenBank under the accession GIOD00000000. The version described  
589 in this paper is the first version, GIOD01000000.

590

#### 591 **Acknowledgements**

592 We are very grateful to Rob Langelaan and Dirk van der Marel (Naturalis) for  
593 microCT scanning specimens, to Vassilis Kitidis (Plymouth Marine Laboratory) and  
594 Matthew Humphreys (NIOZ) for discussion on carbonate chemistry and checking  
595 carbonate system calculations, and to the captain, crew and scientists who took part  
596 in cruise DY084/085 (AMT27) onboard the *RRS Discovery* (PSO: A. Rees). Plankton  
597 collection on the AMT27 cruise was funded by a Vidi grant (016.161351) from the  
598 Netherlands Organisation for Scientific Research (NWO) to KTCAP. The Atlantic  
599 Meridional Transect is funded by the UK Natural Environment Research Council  
600 through its National Capability Long-term Single Centre Science Programme, Climate  
601 Linked Atlantic Sector Science (grant number NE/R015953/1). This study contributes  
602 to the international IMBeR project and is contribution number 335 of the AMT  
603 programme. LKD was supported by the Netherlands Earth System Science Centre  
604 (NESSC), Grant Number: 024.002.001 from the Dutch Ministry of Education, Culture  
605 and Science. This project has received funding from the European Union’s Horizon  
606 2020 research and innovation programme under the Marie Skłodowska-Curie grant

607 agreement No 746186 [POSEIDoN, DW-P] and grant agreement No 844345 [EPIC,  
608 PRS].

609

610 **Author contributions**

611 DW-P, LM, KTCAP and PRS designed the study, DW-P, LM, KTCAP and EG  
612 performed the research, DW-P, LD, KB, PRS and ED carried out sample preparation  
613 and analysis. DW-P, LM and PRS carried out data analysis. All authors contributed to  
614 manuscript preparation.

615

616 **Competing interests:** The authors declare no competing interests.

617 **References**

618

- 619 1. Bednaršek, N., Možina, J., Vogt, M., O'Brien, C. & Tarling, G. A. The global  
620 distribution of pteropods and their contribution to carbonate and carbon biomass in  
621 the modern ocean. *Earth System Science Data* **4**, 167–186 (2012).
- 622 2. Manno, C. *et al.* Threatened species drive the strength of the carbonate pump in  
623 the northern Scotia Sea. *Nature Communications* **9**, (2018).
- 624 3. Buitenhuis, E. T., Le Quéré, C., Bednaršek, N. & Schiebel, R. Large Contribution  
625 of Pteropods to Shallow CaCO<sub>3</sub> Export. *Global Biogeochemical Cycles* **33**, 458–  
626 468 (2019).
- 627 4. Bathmann, U. V., Noji, T. T. & von Bodungen, B. Sedimentation of pteropods in the  
628 Norwegian Sea in autumn. *Deep Sea Research Part A. Oceanographic Research*  
629 *Papers* **38**, 1341–1360 (1991).
- 630 5. Berner, R. A. & Honjo, S. Pelagic sedimentation of aragonite: its geochemical  
631 significance. *Science* **211**, 940–942 (1981).
- 632 6. Gruber, N. *et al.* The oceanic sink for anthropogenic CO<sub>2</sub> from 1994 to 2007.  
633 *Science* **363**, 1193–1199 (2019).
- 634 7. Pachauri, R. K. *et al.* *Climate change 2014: synthesis report. Contribution of*  
635 *Working Groups I, II and III to the fifth assessment report of the Intergovernmental*  
636 *Panel on Climate Change.* (R. Pachauri and L. Meyer (editors), Geneva,  
637 Switzerland, IPCC, 2014).
- 638 8. Riebesell, U. & Gattuso, J.-P. Lessons learned from ocean acidification research.  
639 *Nature Climate Change* **5**, 12 (2014).
- 640 9. Gattuso, J.-P. *et al.* Contrasting futures for ocean and society from different  
641 anthropogenic CO<sub>2</sub> emissions scenarios. *Science* **349**, aac4722 (2015).
- 642 10. Zeebe, R. E., Ridgwell, A. & Zachos, J. C. Anthropogenic carbon release rate  
643 unprecedented during the past 66 million years. *Nature Geoscience* **9**, 325 (2016).
- 644 11. Kitidis, V., Brown, I., Hardman-Mountford, N. & Lefèvre, N. Surface ocean  
645 carbon dioxide during the Atlantic Meridional Transect (1995–2013); evidence of  
646 ocean acidification. *Progress in Oceanography* **158**, 65–75 (2017).
- 647 12. Bednaršek, N., Harvey, C. J., Kaplan, I. C., Feely, R. A. & Možina, J.  
648 Pteropods on the edge: Cumulative effects of ocean acidification, warming, and  
649 deoxygenation. *Progress in Oceanography* **145**, 1–24 (2016).

- 650 13. Kroeker, K. J. *et al.* Impacts of ocean acidification on marine organisms:  
651 quantifying sensitivities and interaction with warming. *Global Change Biology* **19**,  
652 1884–1896 (2013).
- 653 14. Bednaršek, N. *et al.* Extensive dissolution of live pteropods in the Southern  
654 Ocean. *Nature Geoscience* **5**, 881–885 (2012).
- 655 15. Manno, C. *et al.* Shelled pteropods in peril: Assessing vulnerability in a high  
656 CO<sub>2</sub> ocean. *Earth-Science Reviews* **169**, 132–145 (2017).
- 657 16. Maas, A. E., Lawson, G. L., Bergan, A. J. & Tarrant, A. M. Exposure to CO<sub>2</sub>  
658 influences metabolism, calcification and gene expression of the thecosome  
659 pteropod *Limacina retroversa*. *The Journal of Experimental Biology* **221**,  
660 jeb164400 (2018).
- 661 17. Moya, A. *et al.* Near-future pH conditions severely impact calcification,  
662 metabolism and the nervous system in the pteropod *Heliconoides inflatus*. *Global*  
663 *Change Biology* **22**, 3888–3900 (2016).
- 664 18. Bednaršek, N. *et al.* New ocean, new needs: Application of pteropod shell  
665 dissolution as a biological indicator for marine resource management. *Ecological*  
666 *Indicators* **76**, 240–244 (2017).
- 667 19. Burridge, A. K. *et al.* Diversity and abundance of pteropods and heteropods  
668 along a latitudinal gradient across the Atlantic Ocean. *Progress in Oceanography*  
669 **158**, 213–223 (2017).
- 670 20. Batten, R. L. & Dumont, M. P. Shell ultrastructure of the Atlantidae  
671 (Heteropoda, Mesogastropoda) *Oxygyrus* and *Protatlanta*, with comments on  
672 *Atlanta inclinata*. *Bulletin of the American Museum of Natural History* **157**, 263–  
673 310 (1976).
- 674 21. Fabry, V. J. Shell growth rates of pteropod and heteropod molluscs and  
675 aragonite production in the open ocean: implications for the marine carbonate  
676 system. *Journal of Marine Research* **48**, 209–222 (1990).
- 677 22. Lalli, C. M. & Gilmer, R. W. *Pelagic snails: the biology of holoplanktonic*  
678 *mollusks*. (Stanford University Press, 1989).
- 679 23. Mucci, A. The solubility of calcite and aragonite in seawater at various  
680 salinities, temperatures, and one atmosphere total pressure. *American Journal of*  
681 *Science* **283**, 780–799 (1983).
- 682 24. Gazeau, F. *et al.* Impact of elevated CO<sub>2</sub> on shellfish calcification.  
683 *Geophysical Research Letters* **34**, (2007).

- 684 25. Comeau, S., Gorsky, G., Alliouane, S. & Gattuso, J.-P. Larvae of the pteropod  
685 *Cavolinia inflexa* exposed to aragonite undersaturation are viable but shell-less.  
686 *Marine Biology* **157**, 2341–2345 (2010).
- 687 26. Caldeira, K. & Wickett, M. E. Anthropogenic carbon and ocean pH. *Nature*  
688 **425**, 365–365 (2003).
- 689 27. Wall-Palmer, D. *et al.* Vertical distribution and diurnal migration of atlantid  
690 heteropods. *Marine Ecology Progress Series* **587**, 1–15 (2018).
- 691 28. Negrete-García, G., Lovenduski, N. S., Hauri, C., Krumhardt, K. M. & Lauvset,  
692 S. K. Sudden emergence of a shallow aragonite saturation horizon in the Southern  
693 Ocean. *Nature Climate Change* **9**, 313–317 (2019).
- 694 29. Fabry, V. J., McClintock, J. B., Mathias, J. T. & Grebmeier, J. M. Ocean  
695 acidification at high latitudes: the bellwether. *Oceanography* **22**, 160–171 (2009).
- 696 30. Wall-Palmer, D. *et al.* A review of the ecology, palaeontology and distribution  
697 of atlantid heteropods (Caenogastropoda: Pterotracheoidea: Atlantidae). *Journal of*  
698 *Molluscan Studies* **82**, 221–234 (2016).
- 699 31. Wall-Palmer, D., Burrige, A. K. & Peijnenburg, K. T. C. A. *Atlanta*  
700 *ariejansseni*, a new species of shelled heteropod from the Southern Subtropical  
701 Convergence Zone (Gastropoda, Pterotracheoidea). *ZooKeys* **604**, 13–30 (2016).
- 702 32. Lischka, S., Büdenbender, J., Boxhammer, T. & Riebesell, U. Impact of ocean  
703 acidification and elevated temperatures on early juveniles of the polar shelled  
704 pteropod *Limacina helicina*: mortality, shell degradation, and shell growth.  
705 *Biogeosciences* **8**, 919–932 (2011).
- 706 33. Peck, V. L., Oakes, R. L., Harper, E. M., Manno, C. & Tarling, G. A. Pteropods  
707 counter mechanical damage and dissolution through extensive shell repair. *Nature*  
708 *Communications* **9**, (2018).
- 709 34. Bednaršek, N., Tarling, G. A., Fielding, S. & Bakker, D. C. E. Population  
710 dynamics and biogeochemical significance of *Limacina helicina antarctica* in the  
711 Scotia Sea (Southern Ocean). *Deep Sea Research Part II: Topical Studies in*  
712 *Oceanography* **59–60**, 105–116 (2012).
- 713 35. Hunt, B. P. V. *et al.* Pteropods in Southern Ocean ecosystems. *Progress in*  
714 *Oceanography* **78**, 193–221 (2008).
- 715 36. Roberts, D. *et al.* Interannual pteropod variability in sediment traps deployed  
716 above and below the aragonite saturation horizon in the Sub-Antarctic Southern  
717 Ocean. *Polar Biology* **34**, 1739–1750 (2011).

- 718 37. Hartin, C. A., Bond-Lamberty, B., Patel, P. & Mundra, A. Ocean acidification  
719 over the next three centuries using a simple global climate carbon-cycle model:  
720 projections and sensitivities. *Biogeosciences* **13**, 4329–4342 (2016).
- 721 38. Howes, E. L., Eagle, R. A., Gattuso, J.-P. & Bijma, J. Comparison of  
722 Mediterranean Pteropod Shell Biometrics and Ultrastructure from Historical (1910  
723 and 1921) and Present Day (2012) Samples Provides Baseline for Monitoring  
724 Effects of Global Change. *PLOS ONE* **12**, e0167891 (2017).
- 725 39. Roger, L. M. *et al.* Comparison of the shell structure of two tropical  
726 Thecosomata (*Creseis acicula* and *Diacavolinia longirostris*) from 1963 to 2009:  
727 potential implications of declining aragonite saturation. *ICES Journal of Marine*  
728 *Science* **69**, 465–474 (2012).
- 729 40. Manno, C., Morata, N. & Primicerio, R. *Limacina retroversa*'s response to  
730 combined effects of ocean acidification and sea water freshening. *Estuarine,*  
731 *Coastal and Shelf Science* **113**, 163–171 (2012).
- 732 41. Wood, H. L., Spicer, J. I. & Widdicombe, S. Ocean acidification may increase  
733 calcification rates, but at a cost. *Proceedings of the Royal Society B: Biological*  
734 *Sciences* **275**, 1767–1773 (2008).
- 735 42. Howes, E. L. *et al.* Sink and swim: a status review of thecosome pteropod  
736 culture techniques. *Journal of Plankton Research* **36**, 299–315 (2014).
- 737 43. Oakes, R. L. & Sessa, J. A. Determining how biotic and abiotic variables affect  
738 the shell condition and parameters of *Heliconoides inflatus* pteropods from a  
739 sediment trap in the Cariaco Basin. *Biogeosciences* **17**, 1975–1990 (2020).
- 740 44. Cohen, A. L. & Holcomb, M. Why corals care about ocean acidification:  
741 uncovering the mechanism. *Oceanography* **22**, 118–127 (2009).
- 742 45. Holcomb, M., McCorkle, D. C. & Cohen, A. L. Long-term effects of nutrient and  
743 CO<sub>2</sub> enrichment on the temperate coral *Astrangia poculata* (Ellis and Solander,  
744 1786). *Journal of Experimental Marine Biology and Ecology* **386**, 27–33 (2010).
- 745 46. Thomsen, J., Casties, I., Pansch, C., Körtzinger, A. & Melzner, F. Food  
746 availability outweighs ocean acidification effects in juvenile *Mytilus edulis* :  
747 laboratory and field experiments. *Global Change Biology* **19**, 1017–1027 (2013).
- 748 47. Ramajo, L. *et al.* Food supply confers calcifiers resistance to ocean  
749 acidification. *Scientific Reports* **6**, (2016).
- 750 48. Sokolova, I. M., Frederich, M., Bagwe, R., Lannig, G. & Sukhotin, A. A. Energy  
751 homeostasis as an integrative tool for assessing limits of environmental stress



- 752 tolerance in aquatic invertebrates. *Marine Environmental Research* **79**, 1–15  
753 (2012).
- 754 49. Peijnenburg, K. T. C. A. & Goetze, E. High evolutionary potential of marine  
755 zooplankton. *Ecology and Evolution* **3**, 2765–2781 (2013).
- 756 50. Peijnenburg, K. T. C. A. *et al.* The origin and diversification of pteropods  
757 predate past perturbations in the Earth’s carbon cycle. *bioRxiv* (2019)  
758 doi:10.1101/813386.
- 759 51. Wall-Palmer, D. *et al.* Fossil-calibrated molecular phylogeny of atlantid  
760 heteropods (Gastropoda, Pterotracheoidea). *BMC Evolutionary Biology* (in review).
- 761 52. Swart, N. C., Gille, S. T., Fyfe, J. C. & Gillett, N. P. Recent Southern Ocean  
762 warming and freshening driven by greenhouse gas emissions and ozone  
763 depletion. *Nature Geoscience* **11**, 836–841 (2018).
- 764 53. Stoll, M. H. C., Bakker, K., Nobbe, G. H. & Haese, R. R. Continuous-Flow  
765 Analysis of Dissolved Inorganic Carbon Content in Seawater. *Analytical Chemistry*  
766 **73**, 4111–4116 (2001).
- 767 54. Hoppe, C. J. M., Langer, G., Rokitta, S. D., Wolf-Gladrow, D. A. & Rost, B.  
768 Implications of observed inconsistencies in carbonate chemistry measurements for  
769 ocean acidification studies. *Biogeosciences* **9**, 2401–2405 (2012).
- 770 55. Pierrot, D. E., Wallace, D. W. R. & Lewis, E. MS Excel Program Developed for  
771 CO<sub>2</sub> System Calculations. (2011)  
772 doi:10.3334/CDIAC/otg.CO2SYS\_XLS\_CDIA105a.
- 773 56. Mehrbach, C., Culberson, C. H., Hawley, J. E. & Pytkowicz, R. M.  
774 Measurement of the apparent dissociation constants of carbonic acid in seawater  
775 at atmospheric pressure. *Limnology and Oceanography* **18**, 897–907 (1973).
- 776 57. Dickson, A. G. & Millero, F. J. A comparison of the equilibrium constants for  
777 the dissociation of carbonic acid in seawater media. *Deep Sea Research Part A. Oceanographic Research Papers* **34**, 1733–1743 (1987).
- 778 58. Dickson, A. G. Thermodynamics of the dissociation of boric acid in synthetic  
779 seawater from 273.15 to 318.15 K. *Deep Sea Research Part A. Oceanographic*  
780 *Research Papers* **37**, 755–766 (1990).
- 781 59. Woodward, E. M. S. & Harris, C. Atlantic Meridional Transect cruise AMT27  
782 (DY084) micro-molar nutrient measurements from CTD bottle samples during  
783 2017. (2019) doi:10.5285/915141EE-46C9-4DA1-E053-6C86ABC09800.
- 784

- 785 60. Schindelin, J. *et al.* Fiji: an open-source platform for biological-image analysis.  
786 *Nature Methods* **9**, 676–682 (2012).
- 787 61. Hammer, Ø., Harper, D. A. T. & Ryan, P. D. PAST: paleontological statistics  
788 software package for education and data analysis. *Palaeontologia Electronica* **4**,  
789 1–9 (2001).
- 790 62. Bolger, A. M., Lohse, M. & Usadel, B. Trimmomatic: A flexible trimmer for  
791 Illumina sequence data. *Bioinformatics* **30**, 2114–2120 (2014).
- 792 63. Haas, B. J. *et al.* De novo transcript sequence reconstruction from RNA-seq  
793 using the Trinity platform for reference generation and analysis. *Nature Protocols*  
794 **8**, 1494–1512 (2013).
- 795 64. Simão, F. A., Waterhouse, R. M., Ioannidis, P., Kriventseva, E. V. & Zdobnov,  
796 E. M. BUSCO: Assessing genome assembly and annotation completeness with  
797 single-copy orthologs. *Bioinformatics* **31**, 3210–3212 (2015).
- 798 65. Patro, R., Duggal, G., Love, M. I., Irizarry, R. A. & Kingsford, C. Salmon  
799 provides fast and bias-aware quantification of transcript expression. *Nature*  
800 *methods* **14**, 417–419 (2017).
- 801 66. Love, M. I., Huber, W. & Anders, S. Moderated estimation of fold change and  
802 dispersion for RNA-seq data with DESeq2. *Genome biology* **15**, 550 (2014).
- 803 67. Eddy, S. R. Accelerated profile HMM searches. *PLoS Computational Biology*  
804 **7**, (2011).
- 805 68. El-Gebali, S. *et al.* The Pfam protein families database in 2019. *Nucleic Acids*  
806 *Research* **47**, D427–D432 (2019).
- 807 69. Faria, D. *GOSlimmer*. (2017).
- 808 70. Wright, R. M., Aglyamova, G. V., Meyer, E. & Matz, M. V. Gene expression  
809 associated with white syndromes in a reef building coral, *Acropora hyacinthus*.  
810 *BMC Genomics* **16**, 371 (2015).
- 811 71. Voolstra, C. R. *et al.* Rapid Evolution of Coral Proteins Responsible for  
812 Interaction with the Environment. *PLoS ONE* **6**, e20392 (2011).
- 813 72. Metsalu, T. & Vilo, J. ClustVis: a web tool for visualizing clustering of  
814 multivariate data using Principal Component Analysis and heatmap. *Nucleic Acids*  
815 *Research* **43**, W566–W570 (2015).
- 816 73. Haas, B. J. *et al.* De novo transcript sequence reconstruction from RNA-seq  
817 using the Trinity platform for reference generation and analysis. *Nature Protocols*  
818 **8**, 1494 (2013).

819 **Tables**

820

821 Table 1. Typical shell growth of *Atlanta ariejansseni* at ambient conditions over  
822 eleven days. N is the number of specimens sampled on each day.

823

| Sampling day | N  | Measured DIC (μmol/kg) | Calculated TA (μmol/kg) | Measured pH (NBS) | Calculated pCO <sub>2</sub> | Calculated ΩAr | Mean total shell extension (μm) ± 1SD | Maximum total shell extension (μm) | Mean shell extension per day (μm) | Maximum shell extension per day (μm) |
|--------------|----|------------------------|-------------------------|-------------------|-----------------------------|----------------|---------------------------------------|------------------------------------|-----------------------------------|--------------------------------------|
| 0            | -  | 2112                   | 2358                    | 8.15              | 426                         | 2.73           | -                                     | -                                  | -                                 | -                                    |
| 3            | 8  | 2130                   | 2345                    | 8.15              | 417                         | 2.37           | 208 ± 65                              | 299                                | 69                                | 100                                  |
| 5            | 10 | 2141                   | 2368                    | 8.17              | 399                         | 2.49           | 231 ± 77                              | 374                                | 46                                | 75                                   |
| 7            | 10 | 2135                   | 2360                    | 8.17              | 394                         | 2.45           | 306 ± 87                              | 456                                | 44                                | 65                                   |
| 9            | 9  | 2151                   | 2364                    | 8.14              | 426                         | 2.35           | 271 ± 109                             | 486                                | 30                                | 54                                   |
| 11           | 7  | 2173                   | 2378                    | 8.14              | 437                         | 2.29           | 408 ± 148                             | 599                                | 37                                | 54                                   |

824

825

826 Table 2. Measured and calculated (using CO<sub>2</sub>SYs) carbonate system parameters for  
827 the three ocean acidification treatments and the resulting shell growth of *Atlanta*  
828 *ariejansseni* (averaged across all replicates). N1 is the number of specimens  
829 measured for the shell extension (total n=184) and N2 is the number of specimens  
830 measured for volume, thickness and diameter (n=43). Values are presented ± 1 s.d.  
831 when averaged over replicates.

832

| Sample          | Day | Mean measured DIC (μmol/kg) | Mean calculated TA (μmol/kg) | Mean measured pH (NBS) | Mean calculated pCO <sub>2</sub> | Mean calculated ΩAr. | N1 | Mean shell extension (μm) | N2 | Mean volume of shell grown (1000 μm <sup>3</sup> ) | Mean thickness of shell pre-exp (μm) | Mean thickness of shell grown (μm) | Mean maximum shell diameter (μm) |
|-----------------|-----|-----------------------------|------------------------------|------------------------|----------------------------------|----------------------|----|---------------------------|----|----------------------------------------------------|--------------------------------------|------------------------------------|----------------------------------|
| Ambient control | 0   | 2112                        | 2338                         | 8.16                   | 410                              | 2.51                 | -  | -                         | -  | -                                                  | -                                    | -                                  | -                                |
| Ambient control | 3   | 2103 ± 2                    | 2308 ± 0                     | 8.13 ± 0.00            | 441 ± 9                          | 2.27 ± 0.02          | -  | -                         | -  | -                                                  | -                                    | -                                  | -                                |
| Mid-1960s       | 0   | 2110                        | 2352                         | 8.18                   | 391                              | 2.65                 | -  | -                         | -  | -                                                  | -                                    | -                                  | -                                |
| Mid-1960s       | 3   | 2109 ± 6                    | 2341 ± 5                     | 8.19 ± 0.02            | 378 ± 18                         | 2.53 ± 0.10          | 61 | 136 ± 22                  | 14 | 963 ± 210                                          | 5.81 ± 0.89                          | 11.58 ± 1.81                       | 400 ± 49                         |
| Ambient         | 0   | 2110                        | 2339                         | 8.16                   | 405                              | 2.53                 | -  | -                         | -  | -                                                  | -                                    | -                                  | -                                |
| Ambient         | 3   | 2139 ± 10                   | 2350 ± 2                     | 8.14 ± 0.02            | 425 ± 20                         | 2.33 ± 0.08          | 63 | 124 ± 16                  | 15 | 755 ± 246                                          | 5.96 ± 0.61                          | 11.51 ± 1.30                       | 361 ± 72                         |
| Future 2050     | 0   | 2150                        | 2329                         | 8.05                   | 553                              | 2.05                 | -  | -                         | -  | -                                                  | -                                    | -                                  | -                                |
| Future 2050     | 3   | 2154 ± 13                   | 2312 ± 11                    | 8.03 ± 0.00            | 564 ± 5                          | 1.84 ± 0.02          | 60 | 155 ± 26                  | 14 | 871 ± 270                                          | 5.68 ± 0.73                          | 10.58 ± 1.29                       | 386 ± 96                         |

833

834

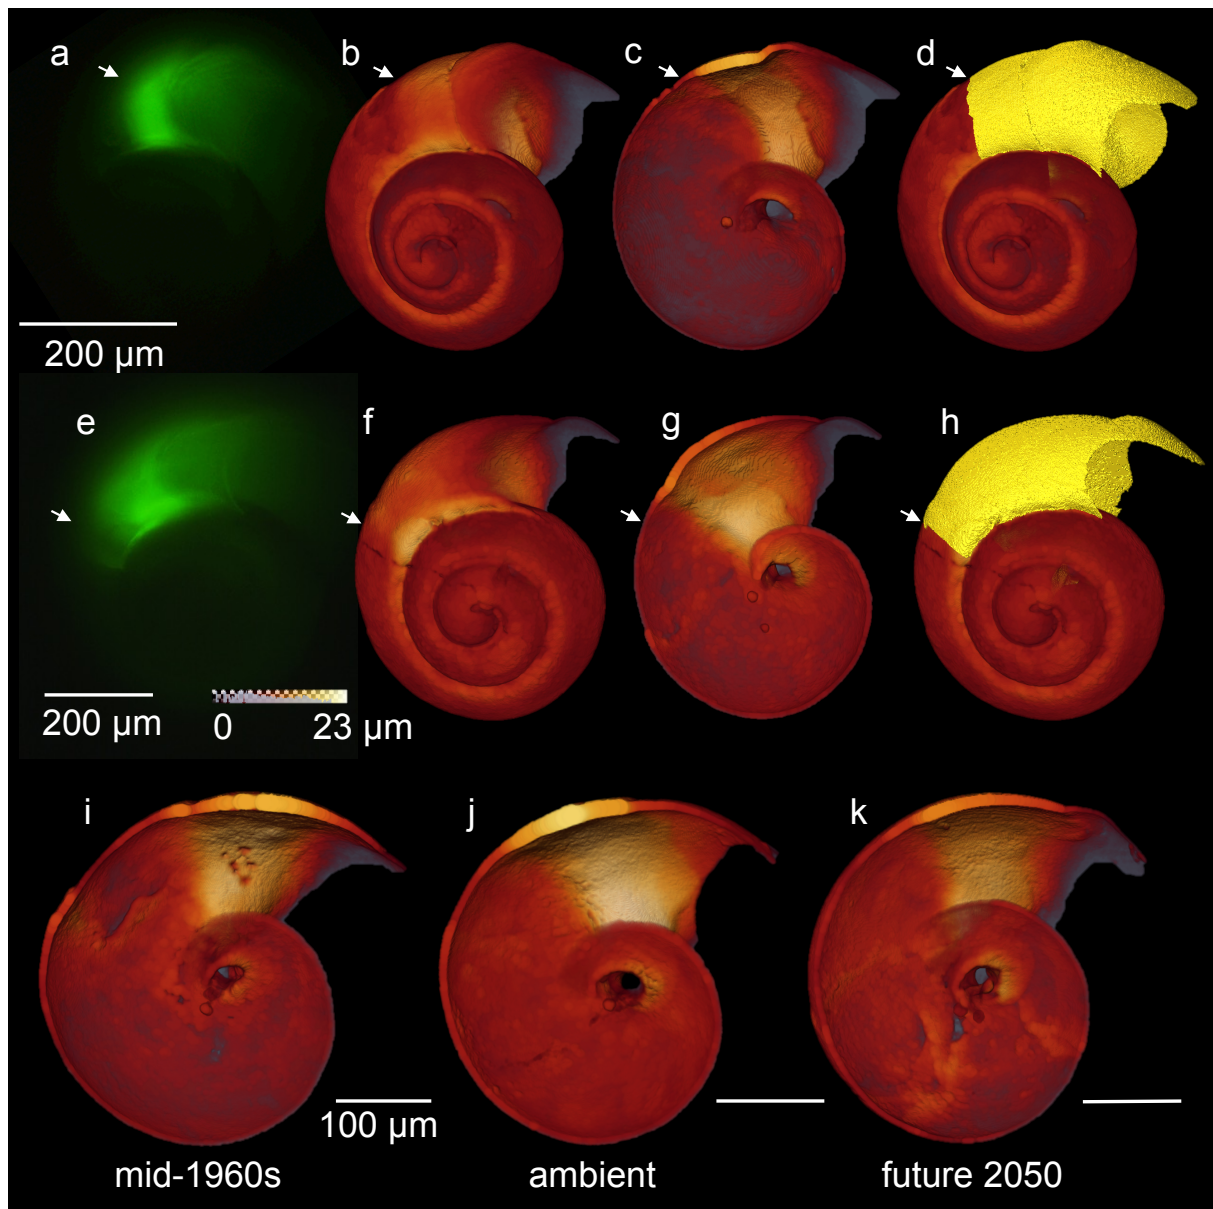

835  
836

837 Figure 1. Quantifying calcification of *Atlanta ariejansseni*. (a, e) Shell extension of the  
838 shell was measured using the fluorescence images. (b, c, f, g) The position of the  
839 onset of the experiment/glow was then identified in thickness maps produced using  
840 micro-CT. White arrows show the onset of the experiment. Thickness maps  
841 presented in the 'glow' colour scheme. (d, h) The shell was segmented to isolate the  
842 part of the shell grown during the experiment. (a-d, i) mid-1960s, (e-h, j) ambient, (k)  
843 future 2050.

844

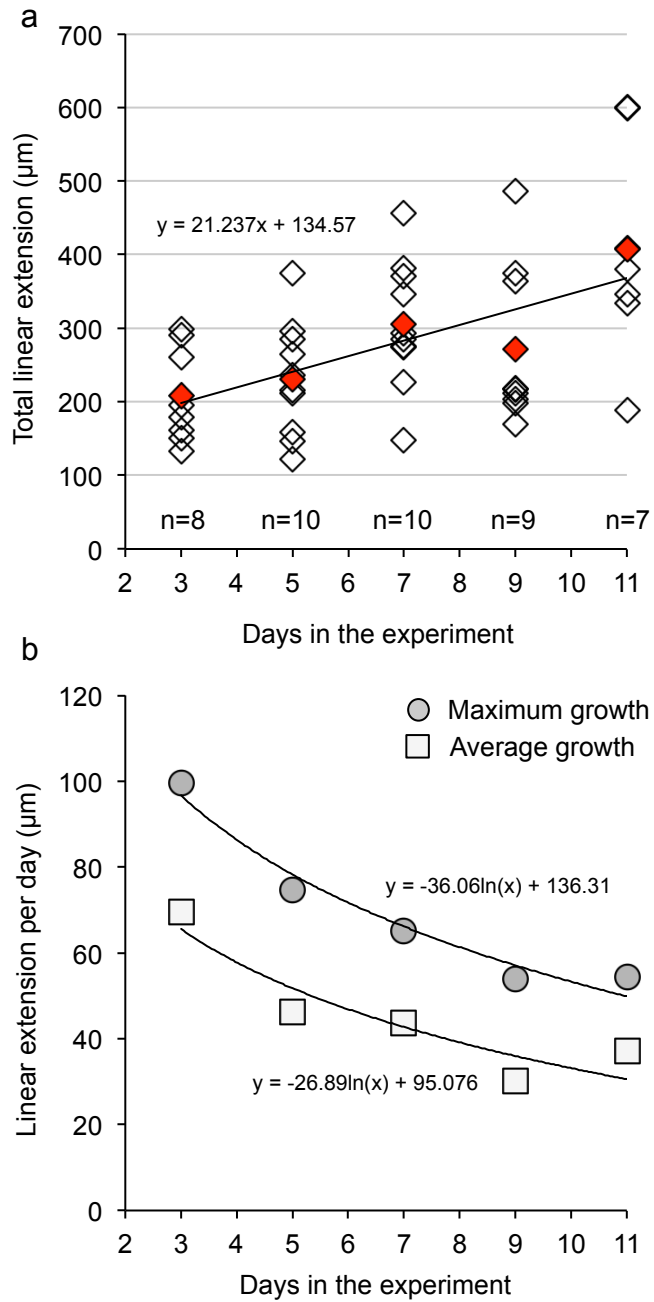

845

846 Figure 2. Shell extension of *Atlanta ariejansseni* in ambient conditions over 11 days.

847 (a) Total shell extension of the shell. Red diamonds represent mean values for each

848 sampling day. (b) Maximum and mean shell extension of the shell for each sampling

849 day decreases exponentially and can be used to estimate the time taken to grown to

850 full adult size, assuming constant conditions.

851

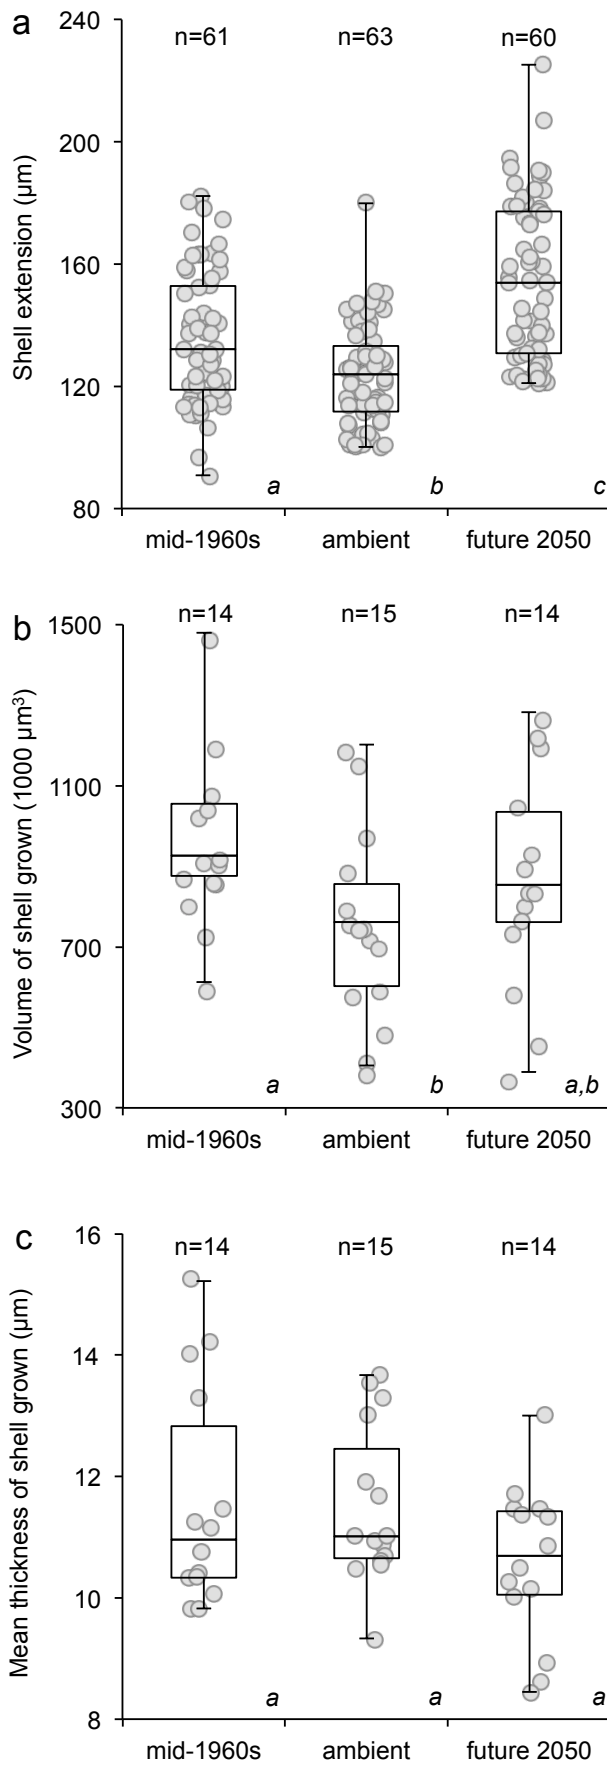

Figure 3. Shell growth of *Atlanta ariejansseni* declines from mid-1960s to ambient ocean pH, but from ambient to future 2050 pH, longer shell was produced. For the boxplots, horizontal lines are median values, boxes are 1<sup>st</sup> and 3<sup>rd</sup> quartiles, and bars show the minimum and maximum measurements. Scattered points show all measurements. Significant differences between treatments are denoted by italic letters below each box. **(a)** Shell extension data gathered across pH for 184 specimens (outliers were removed, see methods). **(b)** Shell volume and **(c)** Shell mean thickness grown under different OA scenarios for a randomly selected subset of 43 specimens.

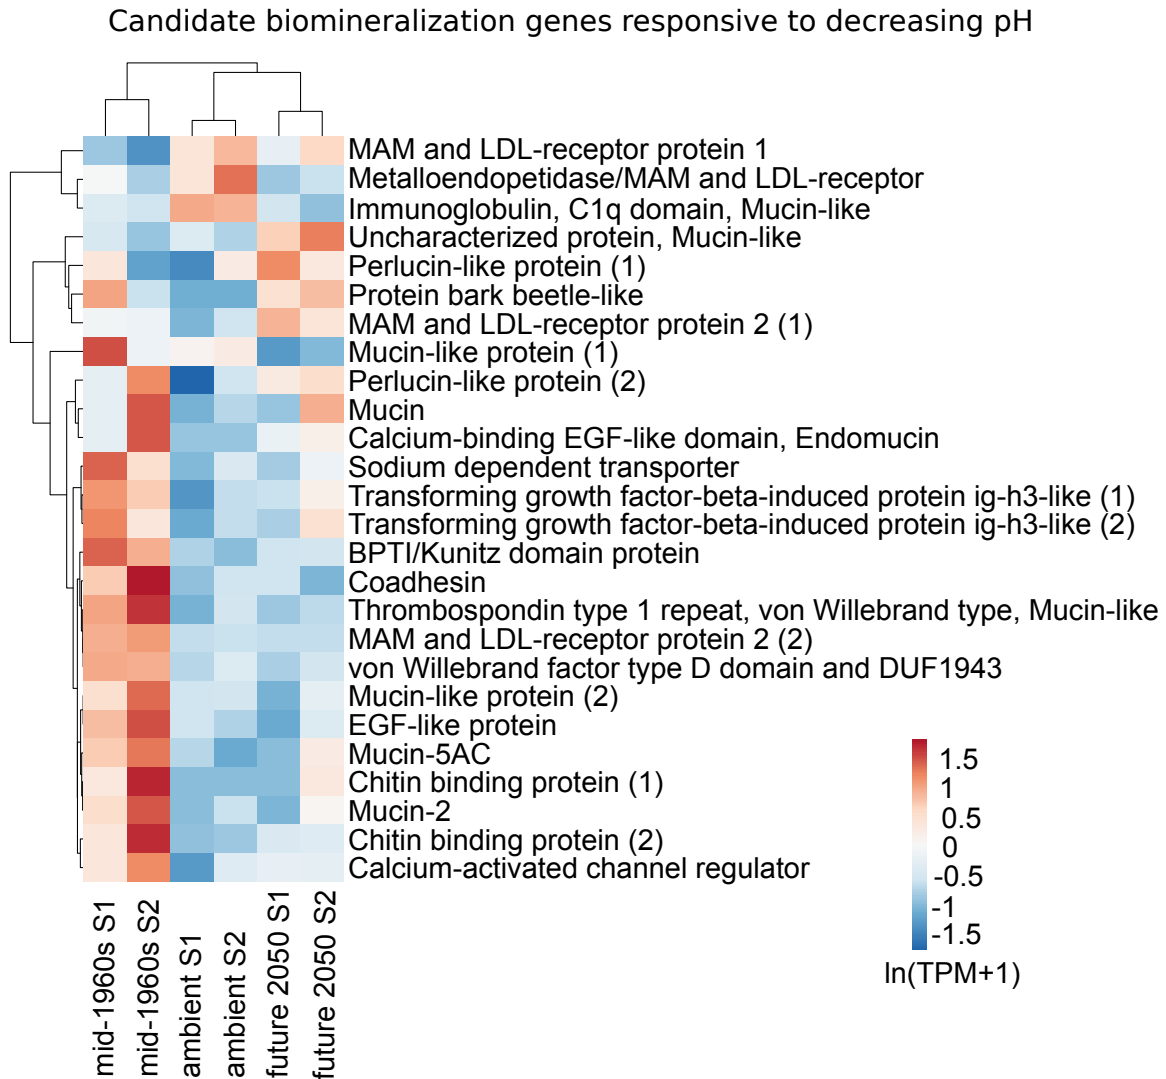

874

875

876 Figure 4. Shell growth and gene expression patterns of candidate biomineralization  
877 genes in mid-1960s, ambient and future 2050 ocean pH conditions. Heatmap of  
878 candidate biomineralization genes that were responsive to pH changes (adj. p-value  
879  $< 0.05$ ). Original values of relative abundance of the transcript in units of Transcripts  
880 Per Million (TPM) were  $\ln(x + 1)$ -transformed; pareto scaling was applied to rows.  
881 Both rows and columns are clustered using correlation distance and mean linkage.

882

883 **Supplementary Tables and Figures provided separately**

884

885 Table S1. Transcriptome assembly statistics of *Atlanta ariejansseni* reported using  
886 Trinity v2.8.4, Quast (Galaxy version 4.6.3), and BUSCO v3 before and after filtering  
887 for potential contaminant contigs. The *Atlanta ariejansseni de novo* transcriptome  
888 assembly consisted of 28,512 predicted 'genes' (here genes as defined by <sup>73</sup>). Giving  
889 overall good quality and 93.5% completeness, the *A. ariejansseni* transcriptome is  
890 suitable for differential expression analysis, and comparable to prior pteropod *de*  
891 *novo* transcriptomes <sup>16,17</sup>.

892

893 Table S2. Transcriptome functional annotation of *Atlanta ariejansseni* using Trinotate:  
894 summary of the strategies and statistics.

895

896 Table S3. Genes responsive to the high pH treatment grouped by potential functional  
897 categories. Differential gene expression was performed using the DESeq2 based in  
898 the pairwise comparison present vs. past (i.e. ambient vs. high pH).

899

900 Table S4. Genes responsive to the low pH treatment grouped by potential functional  
901 categories. Differential gene expression was performed using the DESeq2 package  
902 based in the pairwise comparison future vs. present (i.e. low pH vs. ambient).

903

904 Figure S1. **(a)** Fluorescence image showing a repair (indicated by white arrow) to the  
905 side of a shell that is fluorescing (mid-1960s treatment, replicate 3) and **(b)** a cross  
906 section of the same specimen imaged using microCT showing the repair from the  
907 inside of the shell. **(c, d)** Bright green algae were visible in the stomachs of the  
908 specimens, for example specimens from the 'normal' rate of growth experiment, day  
909 9 **(c)**, and specimens from the mid-1960s treatment, replicate 2 **(d)**.

910

911 Figure S2. The relationship between maximum shell diameter and shell thickness of  
912 *Atlanta ariejansseni*. **(a)** The thickness of shell grown prior to the experiment shows a  
913 significant negative correlation to the maximum shell diameter, indicating that shell  
914 becomes thinner as the specimen increases in size. **(b)** The thickness of shell grown  
915 during the OA experiments is not related to maximum shell diameter because the  
916 normal growth was altered by varying pH and an increase in food concentration. **(c)**



917 Mean thickness of shell grown prior to the experiment significantly correlates to the  
918 mean thickness of the shell grown during the experiment. (Pearson  $r=0.687$ ,  
919  $p<0.001$ ). So, the specimens that grew thicker shells before the experiments grew  
920 proportionally thicker shells during the experiments. This demonstrates that  
921 individuals also naturally vary in their ability to calcify, and these individual  
922 differences persist across the changes in environmental conditions that they  
923 experienced within our experiments.

924

925 Figure S3. Distribution of GC content before and after filtering contaminant  
926 sequences.

927

928 Figure S4. Venn diagram representing the overlap of genes differentially expressed  
929 in *Atlanta ariejansseni* juveniles in the different pH treatments; ( $\geq 1.5$ -fold change;  
930 Benjamini-Hochberg-adjusted  $P<0.05$ ).

931

932 Figure S5. Overview of the gene expression response of *Atlanta ariejansseni*  
933 juveniles to high and low ocean pH. **(a, b)** Hierarchical clustering of gene ontology  
934 terms enriched by genes up-regulated (red) or down-regulated (blue) and  
935 summarized by molecular function (MF) and biological process (BP) for each  
936 pairwise comparison: ambient vs mid-1960s, and future 2050 vs ambient. GO  
937 categories associated with protein synthesis were consistently up-regulated with  
938 decreasing pH: translation (GO:0006412), structural constituents of the ribosome  
939 (GO:0003735), RNA binding (GO:0003723), ribosome biogenesis (GO:0042254),  
940 and ribonucleoprotein complex assembly (GO:0022618). On the other hand, GO  
941 categories associated with morphogenesis and organismal development were down-  
942 regulated under decreasing pH: locomotion (GO:0040011), cell morphogenesis  
943 (GO:0000902), cell adhesion (GO:0007155), nervous system process  
944 (GO: GO:0050877) and cell differentiation (GO: GO:0030154). The size of the font  
945 indicates the significance of the term as indicated by the inset key. The fraction  
946 preceding the GO term indicates the number of genes annotated with the term that  
947 pass an unadjusted p-value threshold of 0.05. Heatmap of the **(c)** fraction of genes  
948 involved in morphogenesis and development and **(d)** fraction of genes involved in  
949 protein synthesis that were responsive to pH changes (adj. p-value  $< 0.05$ ). Original  
950 values of relative abundance of the transcript in units of Transcripts Per Million (TPM)

951 were  $\ln(x+1)$ -transformed; pareto scaling was applied to rows. Both rows and  
952 columns are clustered using correlation distance and mean linkage.
